# Supplementary material
Source: MDPI journal article supplement (https://www.mdpi.com/search?q=ijms-18-00488)
Supplement: s001 [file ijms-18-00488-s001.pdf]

## Supplementary Materials: Does the Prostate Health Index Depend on Tumor Volume? – A Study on 196 Patients after Radical Prostatectomy

Frank Friedersdorff, Britt Groß, Andreas Maxeiner, Klaus Jung, Kurt Miller, Carsten Stephan, Jonas Busch and Ergin Kilic

**Table S1.** Relevant PSA derivatives (median and ranges) in relation to tumor volume, Gleason Score and pathological tumor stage.

| Variable           | Tumor Volume                     |                                   | Gleason Score   |                 |                 |                 | pT Stage        |                 |                 |                  |
|--------------------|----------------------------------|-----------------------------------|-----------------|-----------------|-----------------|-----------------|-----------------|-----------------|-----------------|------------------|
|                    | ≤0.5 cm <sup>3</sup><br>(n = 39) | >0.5 cm <sup>3</sup><br>(n = 157) | ≤7<br>(n = 65)  | 7a<br>(n = 77)  | 7b<br>(n = 36)  | ≥8<br>(n = 18)  | ≤2c<br>154      | 3a<br>29        | 3b<br>11        | 4<br>2           |
| tPSA (ng/mL)       | 2.8 (0.7–10.8)                   | 5.4 (0.7–61.6)                    | 4.2 (0.7–17.7)  | 4.7 (1.4–27.8)  | 5.9 (0.7–61.6)  | 6.1 (1.8–18.3)  | 4.6 (0.7–61.6)  | 5.0 (1.8–17.7)  | 7.2 (3.3–14.9)  | 19.7 (6.7–32.6)  |
| %fPSA              | 15.8 (6.0–35.0)                  | 11.7 (4.0–76.6)                   | 14.4 (4.9–36.9) | 11.9 (4.1–76.6) | 10.4 (4.0–30.0) | 11.3 (6.2–19.6) | 12.7 (4.0–77.6) | 11.7 (4.9–28.2) | 10.8 (6.2–19.4) | 16.0 (11.3–20.7) |
| [-2]proPSA (pg/mL) | 9.4 (2.3–32.0)                   | 13.6 (3.2–117)                    | 10.0 (2.3–46.7) | 13.6 (3.2–117)  | 14.8 (3.4–57.3) | 17.5 (4.6–58.2) | 11.7 (2.3–117)  | 15.1 (3.7–51.5) | 27.0 (8.3–58.2) | 50.3 (44.9–55.7) |
| PHI                | 32.9 (16.1–66.4)                 | 53.7 (9.3–228)                    | 37.5 (10.5–101) | 52.5 (9.3–210)  | 66.8 (20.7–211) | 65.5 (19.4–228) | 43.4 (9.3–211)  | 60.4 (22.3–134) | 74.4 (33.6–228) | 86.6 (69.4–104)  |
